# Supplementary material
Source: PubMed Central journal article supplement (PMC7752840)
Supplement: NIHMS1623649-supplement-supplementary.pdf [file NIHMS1623649-supplement-supplementary.pdf]

## Supplementary Information for

# **Structural properties of target binding by profilaggrin A and B domains and other S100 fused-type calcium-binding proteins**

Alexander J. Hinbest<sup>1</sup>, Sa Rang Kim<sup>1</sup>, Sherif A. Eldirany<sup>1</sup>, Ivan B. Lomakin<sup>2</sup>, Joseph Watson<sup>2</sup>,  
Minh Ho<sup>1</sup>, and Christopher G. Bunick<sup>1,2\*</sup>

<sup>1</sup> Department of Dermatology, Yale University, New Haven, Connecticut, 06520, USA.

<sup>2</sup> Department of Molecular Biophysics and Biochemistry, Yale University, New Haven, CT, 06520, USA.

\* To whom correspondence should be addressed:  
E-mail: [christopher.bunick@yale.edu](mailto:christopher.bunick@yale.edu) (C.G.B.)

### **This file includes:**

- I. **Supplementary Figure S1:** Select mutations localized in the human profilaggrin A and B domains.
- II. **Supplementary Figure S2:** Predicted antimicrobial peptide regions in S100 fused type proteins.
- III. **Supplementary Figure S3:** Distinguishing characteristics of S100 fused type proteins and their clinical relevance.
- IV. **Supplementary Figure S4:** PF-AB interactions with K1/K10 are reduced in the presence of elevated NaCl concentration.
- V. **Supplementary Figure S5:** The B domain is predicted to be highly disordered with little rigid secondary structure.

**a**

# List of Profilaggrin Mutations

| Mutation ID     | Transcript ID    | ClinVar Accession | DNA mutation                | Protein mutation              | Protein domain  | Mechanism                                                                       | Condition                                                                                                                                           |
|-----------------|------------------|-------------------|-----------------------------|-------------------------------|-----------------|---------------------------------------------------------------------------------|-----------------------------------------------------------------------------------------------------------------------------------------------------|
| 1 rs139952786   | Inframe-deletion | ENST00000368799.2 | c.9_14del                   | Leu4_Leu5del                  | PF-A N-terminus | Non synonymous variant                                                          | None                                                                                                                                                |
| 2 rs1395978363  | indel            | ENST00000368799.2 | c.21_22insTTTT              | p.Ile8PhefsTer7               | PF-A N-terminus | Extreme truncation 7 amino acids later (loss of PFAB and repeats)               | None                                                                                                                                                |
| 3 rs1168885071  | indel            | ENST00000368799.2 | c.22_23insC                 | p.Ile8TrpfsTer6               | PF-A N-terminus | Extreme truncation 6 amino acids later (loss of PFAB and repeats)               | None                                                                                                                                                |
| 4 rs756605558   | indel            | ENST00000368799.2 | c.63dupA                    | p.Asp22ArgfsTer2              | PF-A N-terminus | Extreme truncation 2 amino acids later (loss of PFAB and repeats)               | None                                                                                                                                                |
| 5 rs929085219   | indel            | ENST00000368799.2 | c.71delA                    | p.Asn24ThrfsTer5              | PF-A N-terminus | Extreme truncation 5 amino acids later (loss of PFAB and repeats)               | None                                                                                                                                                |
| 6 rs1193300583  | indel            | ENST00000368799.2 | c.83_84dup                  | Ser29Ter                      | PF-A N-terminus | Truncation at mutation site (loss half end of PFB and all repeats)              | None                                                                                                                                                |
| 7 rs114733570   | SNP              | ENST00000368799.2 | c.94G>T                     | p.Glu32Ter                    | PF-A N-terminus | Extreme truncation at mutation site (loss of PFAB and repeats)                  | Ichthyosis vulgaris                                                                                                                                 |
| 8 rs752827914   | indel            | ENST00000368799.2 | c.120_121insCTTCTGGAAAAGGAA | Leu36_Glu40dup                | PF-A N-terminus | Non synonymous variant                                                          | None                                                                                                                                                |
| 9 rs774514736   | indel            | ENST00000368799.2 | c.198delC                   | p.Asn66LysfsTer11             | PF-A N-terminus | Extreme truncation 11 amino acids later (loss of PFAB and repeats)              | None                                                                                                                                                |
| 10 rs769046914  | indel            | ENST00000368799.2 | c.207delT                   | p.Ile69MetfsTer8              | PF-A C-terminus | Extreme truncation 8 amino acids later (loss of PFAB and repeats)               | None                                                                                                                                                |
| 11 rs1195478941 | indel            | ENST00000368799.2 | c.250_254del                | p.Ala84LeufsTer2              | PF-A/B boundary | Extreme truncation 2 amino acids later (loss of PFAB and repeats)               | None                                                                                                                                                |
| 12 rs766604084  | Inframe-deletion | ENST00000368799.2 | c.306_314del                | p.Arg102_His104del            | PFB N-terminus  | Non synonymous variant                                                          | None                                                                                                                                                |
| 13 rs762698116  | indel            | ENST00000368799.2 | c.344delA                   | p.Gln115ArgfsTer9             | PFB N-terminus  | Extreme truncation 9 amino acids later (loss half end of PFB and repeats)       | None                                                                                                                                                |
| 14 rs773056944  | Inframe-deletion | ENST00000368799.2 | c.356_364del                | p.Lys119_Asn121del            | PFB N-terminus  | Non synonymous variant                                                          | None                                                                                                                                                |
| 15 rs769677999  | indel            | ENST00000368799.2 | c.388_391del                | p.Arg130GlufsTer63            | PFB N-terminus  | Extreme truncation 63 amino acids later (loss half end of PFB and repeats)      | None                                                                                                                                                |
| 16 rs76289194   | indel            | ENST00000368799.2 | c.441_442del                | p.Gly149GlufsTer4             | PFB N-terminus  | Extreme truncation 4 amino acids later (loss half end of PFB and repeats)       | None                                                                                                                                                |
| 17 rs761789405  | indel            | ENST00000368799.2 | c.441delA                   | p.Arg151GlyfsTer43            | PFB N-terminus  | Extreme truncation 43 amino acids later (loss half end of PFB and repeats)      | None                                                                                                                                                |
| 18 rs768243733  | indel            | ENST00000368799.2 | c.451delA                   | p.Arg151GlyfsTer43            | PFB N-terminus  | Extreme truncation 43 amino acids later (loss half end of PFB and repeats)      | None                                                                                                                                                |
| 19 rs746683647  | indel            | ENST00000368799.2 | c.477dupA                   | p.Glu160ArgfsTer10            | PFB N-terminus  | Truncation 10 amino acids later (loss half end of PFB and repeats)              | Not Provided                                                                                                                                        |
| 20 rs746683647  | indel            | ENST00000368799.2 | c.477delA                   | p.Glu160LysfsTer34            | PFB N-terminus  | Truncation 34 amino acids later (loss half end of PFB and repeats)              | Not Provided                                                                                                                                        |
| 21 rs1168180592 | indel            | ENST00000368799.2 | c.482_485del                | p.Arg161LysfsTer32            | PFB N-terminus  | Truncation 32 amino acids later (loss half end of PFB and repeats)              | None                                                                                                                                                |
| 22 rs1214424848 | SNP              | ENST00000368799.2 | c.487G>T                    | p.Gly163Ter                   | PFB N-terminus  | Truncation at the mutation site (loss half end of PFB and repeats)              | Atopic Dermatitis, Eczema, Ichthyosis vulgaris                                                                                                      |
| 23 rs1214424848 | SNP              | ENST00000368799.2 | c.487G>A                    | p.Gly163Arg                   | PFB N-terminus  | Missense Variant                                                                | None                                                                                                                                                |
| 24 rs7557882660 | indel            | ENST00000368799.2 | c.515_516del                | p.Glu172ValfsTer7             | PFB N-terminus  | Truncation 7 amino acids later (loss half end of PFB and repeats)               | None                                                                                                                                                |
| 25 rs1168843216 | indel            | ENST00000368799.2 | c.527_528insA               | p.Asn176LysfsTer4             | PFB N-terminus  | Truncation 4 amino acids later (loss half end of PFB and repeats)               | None                                                                                                                                                |
| 26 rs1191273869 | indel            | ENST00000368799.2 | c.529_530insTGATTTTCATA     | p.His177delinsLeuTyrPheHisAsn | PFB N-terminus  | Altering Variant                                                                | None                                                                                                                                                |
| 27 rs1218912272 | SNP              | ENST00000368799.2 | c.544A>T                    | p.Lys182Ter                   | PFB N-terminus  | Truncation at mutation site (loss half end of PFB and all repeats)              | Abnormality of salivation and skin, Dry skin, Ichthyosis, Congenital cerebellar hypoplasia, Microcephaly, Feeding difficulties, Paroxysmal dystonia |
| 28 rs1335400957 | indel            | ENST00000368799.2 | c.549del                    | p.Glu184ArgfsTer10            | PFB N-terminus  | Truncation 10 amino acids later (loss half end of PFB and repeats)              | None                                                                                                                                                |
| 29 rs771721862  | indel            | ENST00000368799.2 | c.557_558insA               | p.Asn186LysfsTer4             | PFB N-terminus  | Truncation 4 amino acids later (loss half end of PFB and repeats)               | Not Provided                                                                                                                                        |
| 30 rs749678415  | indel            | ENST00000368799.2 | c.617_620del*621_624del     | p.Glu208ThrfsTer15            | PFB C-terminus  | Truncation 15 amino acids later (loss end of PFB and all repeats)               | None                                                                                                                                                |
| 31 rs778181683  | Inframe-deletion | ENST00000368799.2 | c.635_637del                | p.Glu212del                   | PFB C-terminus  | Non synonymous variant                                                          | None                                                                                                                                                |
| 32 rs756626190  | indel            | ENST00000368799.2 | c.660delA                   | p.Gly221GlufsTer3             | PFB C-terminus  | Truncation 3 amino acids later (loss end of PFB and all repeats)                | Not Provided                                                                                                                                        |
| 33 rs1222586539 | indel            | ENST00000368799.2 | c.678delA                   | p.Lys226AsnfsTer26            | PFB C-terminus  | Truncation 26 amino acids later (loss end of PFB and all repeats)               | None                                                                                                                                                |
| 34 rs753134537  | indel            | ENST00000368799.2 | c.727delG                   | p.Ala243ProfsTer9             | PFB C-terminus  | Truncation 9 amino acids later (loss end of PFB and all repeats)                | None                                                                                                                                                |
| 35 rs1381346375 | Inframe-deletion | ENST00000368799.2 | c.739_741del                | p.Thr247del                   | PFB C-terminus  | Non synonymous variant                                                          | None                                                                                                                                                |
| 36 rs781280495  | indel            | ENST00000368799.2 | c.745dupA                   | p.Ser249LysfsTer10            | PFB C-terminus  | Truncation 10 amino acids later (loss end of PFB and all repeats)               | Not Provided                                                                                                                                        |
| 37 rs755000793  | indel            | ENST00000368799.2 | c.762_766del                | p.Lys255IlefsTer2             | PFB C-terminus  | Truncation 2 amino acids later (loss end of PFB and all repeats)                | None                                                                                                                                                |
| 38 rs1557882406 | indel            | ENST00000368799.2 | c.770delA                   | p.Tyr257LeufsTer15            | PFB C-terminus  | Truncation 15 amino acids later (loss end of PFB and all repeats)               | None                                                                                                                                                |
| 39 rs386635460  | substitution     | ENST00000368799.2 | c.769_770delinsGT           | p.Tyr257Val                   | PFB C-terminus  | Missense variant                                                                | None                                                                                                                                                |
| 40 rs198885226  | SNP              | ENST00000368799.2 | c.779C>R                    | p.Ser260Ter                   | PFB C-terminus  | Truncation at mutation site (loss end of PFB and all repeats)                   | Not Provided                                                                                                                                        |
| 41 rs751629874  | indel            | ENST00000368799.2 | c.834delT                   | p.Asn278LysfsTer168           | PFB C-terminus  | Truncation 168 amino acids later (loss start from half end of the first repeat) | None                                                                                                                                                |
| 42 rs1400304361 | indel            | ENST00000368799.2 | c.856delG                   | p.Glu286SerfsTer160           | PFB C-terminus  | Truncation 160 amino acids later (loss start from half end of the first repeat) | None                                                                                                                                                |

**b**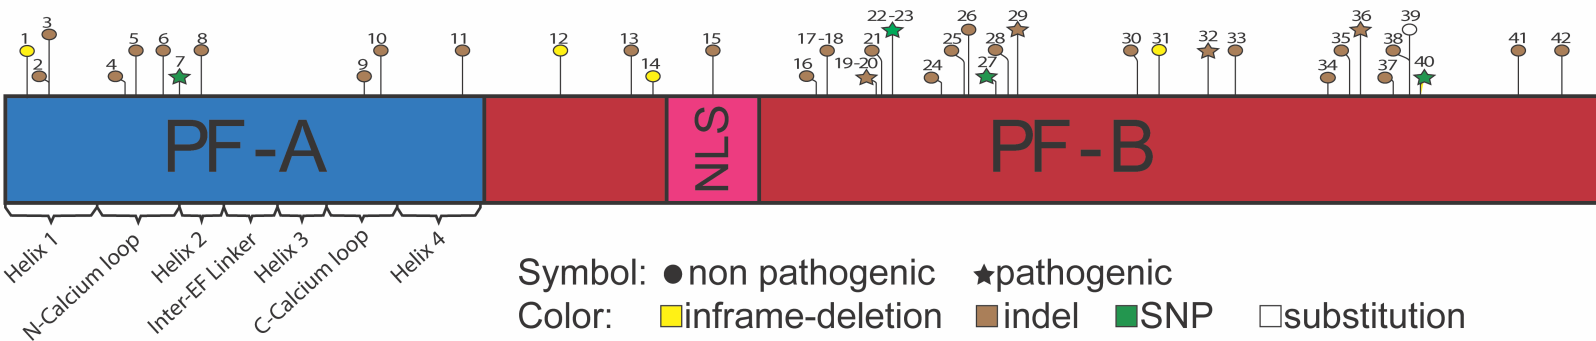

## Supplementary Figure S1.

### Select mutations localized in the human profilaggrin A and B domains.

(a) List of select mutations in profilaggrin A and B domains. The databases at the National Center for Biotechnology Information and Ensembl GRCh37 were used to identify mutations in the A and B domains that satisfied the following criteria: were deletions, insertions, or had reported clinical relevance. We excluded gain of premature stop codons unless clinical relevance had been established. These criteria identified 42 mutations, 11 in PF-A (blue, top) and 31 in PF-B (red, bottom). Under “Condition”: None means no clinical effect documented to date; Not Provided means clinical relevance reported but exact condition not specified. Mutations with reported disease association have those diseases listed in red. (b) The 42 mutations listed in (a) are mapped to the PF-A and PF-B domains, showing their relative location. PF-A is further subdivided into structural domains, where six mutations (4-7, 9-10) lie within the calcium binding loops. One mutation (15) lies within the nuclear localization signal (NLS) of PF-B.

# a SFTP C-terminal domain sequence alignment

```

Trichohyalin -----HRQVGEIKSQ-----
Trichohyalin-like-1 -----QKSP-----
Profilaggrin SHRDTASHVQSSPVQSDSSTAKEHGHFSSLSQDSAYHSGIQSRGSPHSSSSYHYQSEGTE
Profilaggrin-2 -----TTRHGH-----SGY--GQSTQTGSRSSRASHFQSHSSE
Repetin -----QSQTGEIQGQNKYFQGTEGT
Cornulin -----EQDRSQTVSHGG-----ARE--QGQTQTQPGSGQRWQVSN---
Hornerin -----SQHGSGSGQDGY--S-----

Trichohyalin -----EGKGH-----GRL-----
Trichohyalin-like-1 -----AKKEH-----NSSVPWSSLEKQ
Profilaggrin RQ-----KGQSGLVWRHGSYGSADYDYGESGFRHSQHGS----VSYNSNPVVKERSDI
Profilaggrin-2 RQ-----RHGSSQVWKHGSYGAPEYDYGHTGYGPGGSR----KSI NSHLSWSTDSTA
Repetin RKASYVEQSGRSGRL--SQQTPGQEGYQNGQGF--QSR-----DSQQNGHQVWEPEEDS
Cornulin -----PEAGETVPGGQAQ--TGASTE-----SGRQEWSSSTHP-
Hornerin -----YCKGGSNH--DGGSSGSYFLSFPSSSTSPYEYVQE-

Trichohyalin --LEPGTHQFASVPVRSSPLYEYIQEQRSQYRP-----
Trichohyalin-like-1 MQRDQEPCSVVERGAVYSSPLYQYLQEKILOQTNTVQEEHQKQVQIAQASGPELCSVSLTS
Profilaggrin -----CK-----A-SAFGKDHPRIYATYINKDPGLCGHS--S
Profilaggrin-2 -----NK-----Q--LSRH-----
Repetin -----QHHQHKL LAQIQQERPLCHKG--R
Cornulin -----RRCVTEGQGDRTPTVVG--E
Hornerin -----QRCYFYQ-----

Trichohyalin -----
Trichohyalin-like-1 EISDCS---VFFNY-----SQASQPYTRGLPL-----
Profilaggrin DISKQL-----GFS-----QSQRYY
Profilaggrin-2 -----
Repetin DWQSCS-----SEQGHRQAQTRQSHGEGLSHWAEQGHQ TWDRHS
Cornulin EWVDDHSRETVILRLDQGNLHTSVSSAQGDAAQSEKRGIT-----ARELYS
Hornerin -----

Trichohyalin -----
Trichohyalin-like-1 ---DESPAGAQETPAPQALEDKQGHQPRERLVLQREASTTKQ-----
Profilaggrin YYE-----
Profilaggrin-2 -----
Repetin HESQEGPCGTQDRR---THKDEQNHQRRDRQTHEHEQSHQRRDRQTHEDEKQNRQRDRQ
Cornulin YLRSTKP-----
Hornerin -----

Trichohyalin -----
Trichohyalin-like-1 -----
Profilaggrin -----
Profilaggrin-2 -----
Repetin HEDEQNHQR
Cornulin -----
Hornerin -----

```

# b Predicted Antimicrobial Peptide Regions

```

Profilaggrin
3905 SHRDTASHVQSSPVQSDSSTAKEHGHFSSLSQDSAYHSGIQSRGSPHSSSSYHYQSEGTERQKQSGSLVW 3974
      CCCCCCCCCCTTEECTHTHHHHHHHHHEEHHTTTCEETEECTCCTCCCTTCEEECTTHHHHTHHHEEEEC

3975 RHGSYGSADYDYGESGFRHSQHGSVSYNSNPVVKERSDICKASAFGKDHPRIYATYINKDPGLCGHSSD 4044
      CTTCCCTCCCCCTTCCCCCCCCCCCCCTTEEHHTHTHHHHHHHHHTCTCEEEECCTCTCCCCCTH

4045 ISKQLGFSQSQRYYYE 4061
      EHTEEEHTEEEEEECC

Profilaggrin-2
2304 TTRHGHSGYGQSTQTGSRSSRASHFQSHSSERQRHGSSQVWKHGSYGAPEYDYGHTGYGPGGSRKSI SN 2373
      CCCCCCTCEETEEEECCTCCTCCCCCTCCTCCTCCCTTEECCTTCCCTCCEEEEEECCTCCCCCTCCCT

2374 SHLSWSTDSTANKQLSRH 2391
      CCEEEHTHHHHHHEHCCT

Trichohyalin-like protein
761 QKSPAKKEHNSSVPWSSLEKQMQRDQEPCSVVERGAVYSSPLYQYLQEKILOQTNTVQEEHQKQVQIAQAS 830
      THTHHHHHCCCTCEEEHHHHHHHHHHHTEHHHHHHHHEEETEEEEHHHHHEEEEEHHHHHHHEEEEEHHHHCC

831 GPELCSVSLTSEISDCSVFFNYSQASQPYTRGLPLDES PAGAQETPAPQALEDKQGHQPRERLVLQREAS 900
      TTCEEEEEEEETEEEEEEEEEEEEETEETEETECCCTTHTHHHHHHHHHHHTHTHHHHHHHEEHHHHHH

901 TTKQ 904
      ECCC

Repetin
585 QSQTGEIQGQNKYFQGTEGTRKASYVEQSGRSGRLSQQTPGQEGYQNGQGFQSRDSQQNGHQVWEPEED 654
      ETHHHHEEETEEEEHTCCCCCHHHEHTCCCTCEETEETEETEEEEETEEEEHTHHHEETEHHHHHHHH

655 SQHHQHKL LAQIQQERPLCHKGRDWQSCSSEQGHRQAQTRQSHGEGLSHWAEQGHQ TWDRHSHEQEG 724
      THTHHHHHEHEHHHTHEECCTTCEEEHHTHTHHHHHEEHTCCCTCHHHHHHHHTEEEEHCTCCCCCTCCT

725 PCGTQDRRTHKDEQNHQRRDRQTHEHEQSHQRRDRQTHEDEKQNRQRDRQTHEDEQNHQR 784
      CEEECTTHTHHHTHTHHHTCHHHHHHHHTHHHTHHHHHHHTHCCCCCHHHHHHTHTHHCC

```

Supplementary Figure S2. Predicted antimicrobial peptide regions in S100 fused type proteins.

a) Multiple sequence alignment of carboxy-terminal domains (CTD) of the SFTP family shows poor conservation.

b) Predicted antimicrobial regions in the CTD for human profilaggrin, profilaggrin-2, trichohyalin-like 1 protein, and repetin. Lines above the bolded sequence represent computationally predicted antimicrobial peptide regions with the different colors indicating different algorithms used to make the prediction (black, SVM; red, Random Forest; green, Discriminant Analysis; blue, Artificial Neural Network). Letters below each bolded sequence represent respective predicted secondary structure. C, coil; T, turn; E, sheet; H, helix.

| SFTP                       | PROFILAGGRIN (FLG)                                                                                                                        | FILAGGRIN-2 (FLG2)                                                                                                                  | HORNERIN (HRNR)                                                                                                                           | REPETIN (RPTN)                                                                                                     | CORNULIN (CRNN)                                                                                           | TRICHOHYALIN (TCHH)                                                                               | TRICHOHYALIN-LIKE PROTEIN-1 (TCHHL1)                                                                              |
|----------------------------|-------------------------------------------------------------------------------------------------------------------------------------------|-------------------------------------------------------------------------------------------------------------------------------------|-------------------------------------------------------------------------------------------------------------------------------------------|--------------------------------------------------------------------------------------------------------------------|-----------------------------------------------------------------------------------------------------------|---------------------------------------------------------------------------------------------------|-------------------------------------------------------------------------------------------------------------------|
| CENTRAL REPEATS            | 10-12 monomers. Further degradation to component amino acids (NMF). Highly charged.<br><br>Mostly random coil, almost no helix formation. | Two types: A-type (50-77% homology with hornerin); B-type (28-39% homology with filaggrin).<br><br>Rich in histidine and glutamine. | 5 repeats of three segments (A, B, and C), divided into four repeats.<br><br>Glycine loops suggestive of elastic and adhesive properties. | 28 repeats of 12 amino acids with positional conservation of glutamine, glycine, serine, and histidine.            | 2 repeat sequences, rich in glutamine and threonine.<br><br>Homology to a bacterial GPI anchored protein. | Domains 2-8, each containing varying repeats.<br><br>Mostly $\alpha$ -helical. Rich in glutamine. | Rich in glutamine and lysine.<br><br>Contains NLS.                                                                |
| C-TERMINAL DOMAIN          | Function unknown. Essential for processing.                                                                                               | Antimicrobial activity.                                                                                                             | Function unknown.                                                                                                                         | Function unknown.                                                                                                  | Function unknown. Likely random-coil.                                                                     | Function unknown. Complete conservation of 13 residues.                                           | Function unknown. Contains TM domain.                                                                             |
| KERATIN-BINDING            | Yes; filaggrin monomers.                                                                                                                  | Yes; demonstrated <i>in vitro</i> .                                                                                                 | Yes; domain 6 and 8, CTD.                                                                                                                 | -                                                                                                                  | -                                                                                                         | Yes; with IRS keratin intermediate filaments.                                                     | -                                                                                                                 |
| AMP ACTIVITY               | CTD may be potential AMP.                                                                                                                 | C-terminal domain                                                                                                                   | Tandem A repeat                                                                                                                           | CTD may be potential AMP.                                                                                          | -                                                                                                         | -                                                                                                 | CTD may be potential AMP.                                                                                         |
| NUCLEUS TARGETING ACTIVITY | Yes; NLS in B domain.                                                                                                                     | Unknown                                                                                                                             | Yes; bactericidal via ribosome-targeting.                                                                                                 | Unknown                                                                                                            | Unknown                                                                                                   | 8 predicted monopartite NLS                                                                       | Unknown                                                                                                           |
| EXPRESSION                 | Keratohyalin granules.                                                                                                                    | Keratohyalin granules.                                                                                                              | Keratohyalin granules.                                                                                                                    | Inter-follicular epidermis, IRS, acrosyringium.                                                                    | Keratinocytes; scalp skin, foreskin.                                                                      | IRS                                                                                               | Distal IRS, basal layer and keratinocytes.                                                                        |
| DISEASE IMPLICATION        | Ichthyosis vulgaris, Atopic dermatitis, asthma, hay-fever, peanut allergy.                                                                | Mutations associated with Atopic dermatitis, peeling skin syndromes 3 and 6; Downregulated in psoriatic lesions.                    | Overexpressed in: hepatocellular carcinoma, psoriatic and wound-healing skin.                                                             | Low protein level associated with schizophrenia and bipolar disorder; Mutations associated with Atopic dermatitis. | Downregulation associated with oral esophageal and squamous carcinoma.                                    | Mutations cause uncombable hair syndrome 3; associated with Alopecia areata.                      | Strongly expressed in basal- and squamous-cell carcinoma; overexpression in Psoriasis vulgaris and Lichen planus. |

AMP: anti-microbial peptide; CTD: C-terminal domain; IRS: inner root sheath; NMF: natural moisturizing factor; TM: transmembrane domain; NLS: nuclear localization sequence.

### Supplementary Figure S3. Distinguishing characteristics of S100 fused-type proteins (SFTPs) and their clinical relevance.

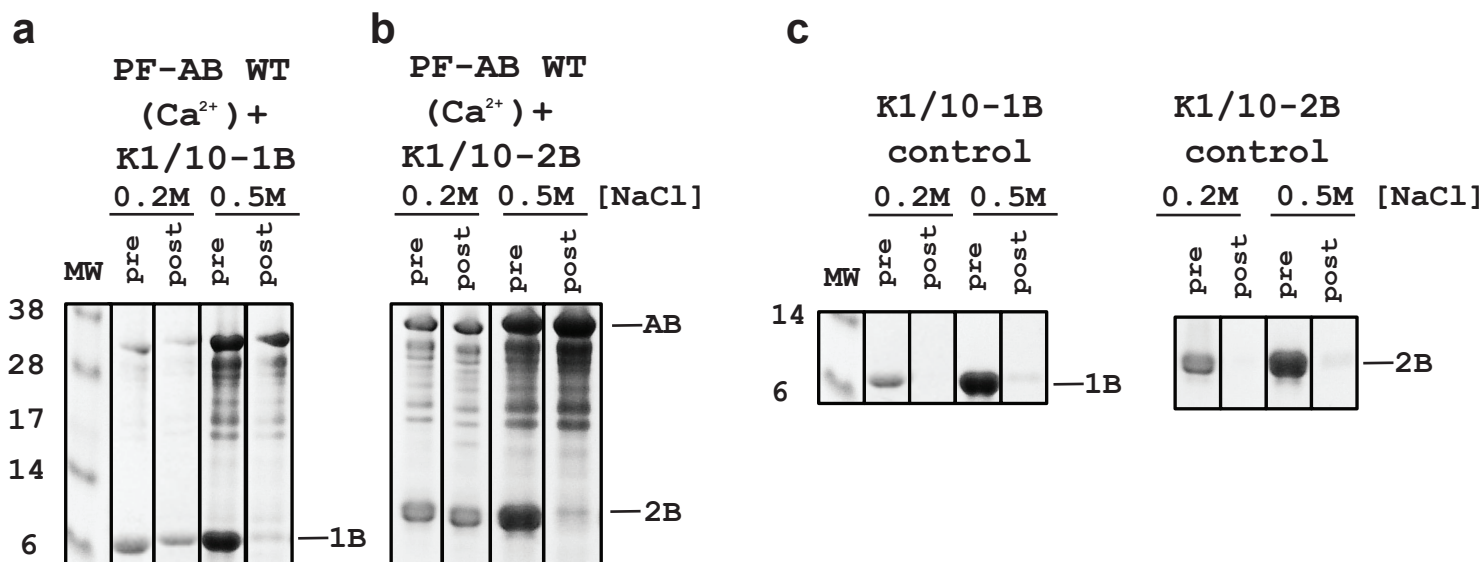

#### Supplementary Figure S4.

#### PF-AB interactions with K1/K10 are reduced in the presence of elevated NaCl concentration.

Ni<sup>2+</sup> pulldown assays in the presence of Ca<sup>2+</sup> using His<sub>6</sub>-tagged PF-AB as bait protein for keratin 1/10-1B (a) and keratin 1/10-2B (b) heterocomplex at two different NaCl concentrations (200 mM, 500 mM). Reduced PF-AB binding of K1/K10 is observed for both the 1B and 2B domains in the 500 mM NaCl condition. Lanes are designated either “pre” or “post” the washing away of unbound proteins. (c) K1/K10-1B and K1/K10-2B do not bind the Ni<sup>2+</sup> resin in the absence of PF-AB. The PF-AB (res. 1-257) construct was used in this experiment.

**a**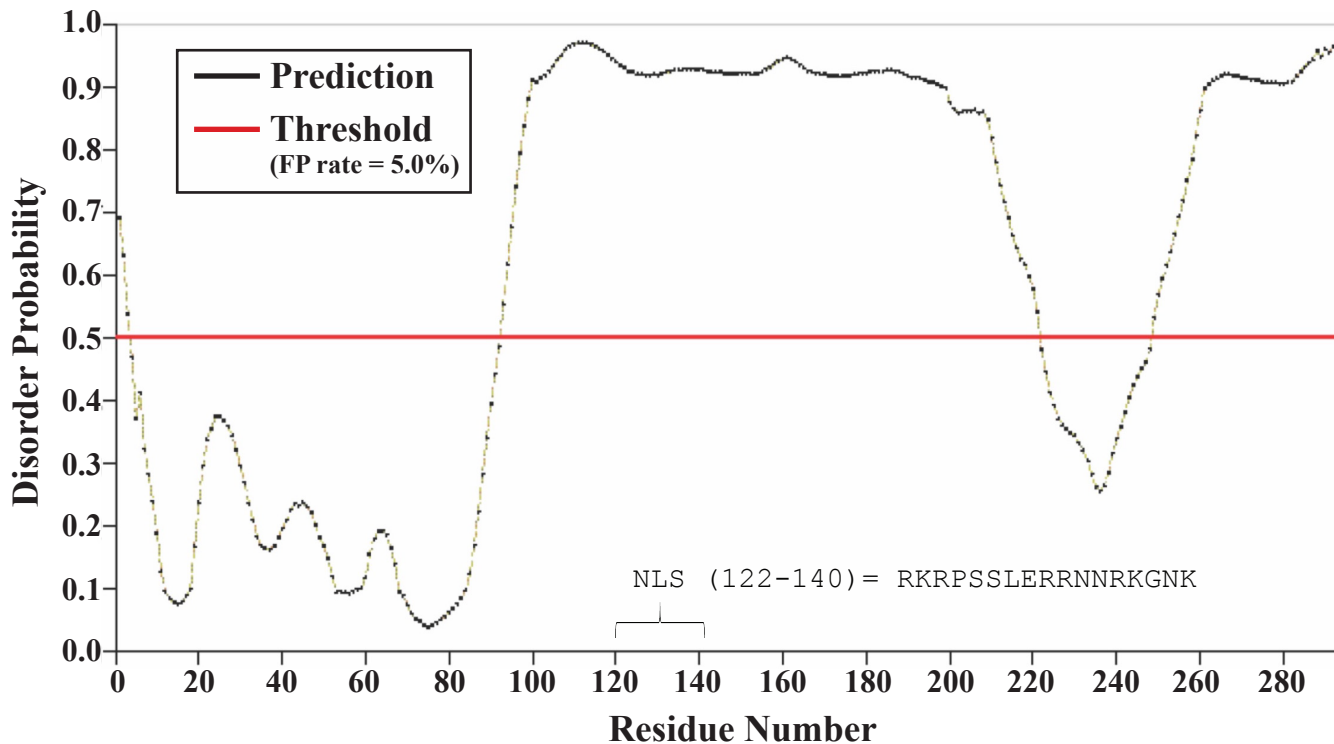**b**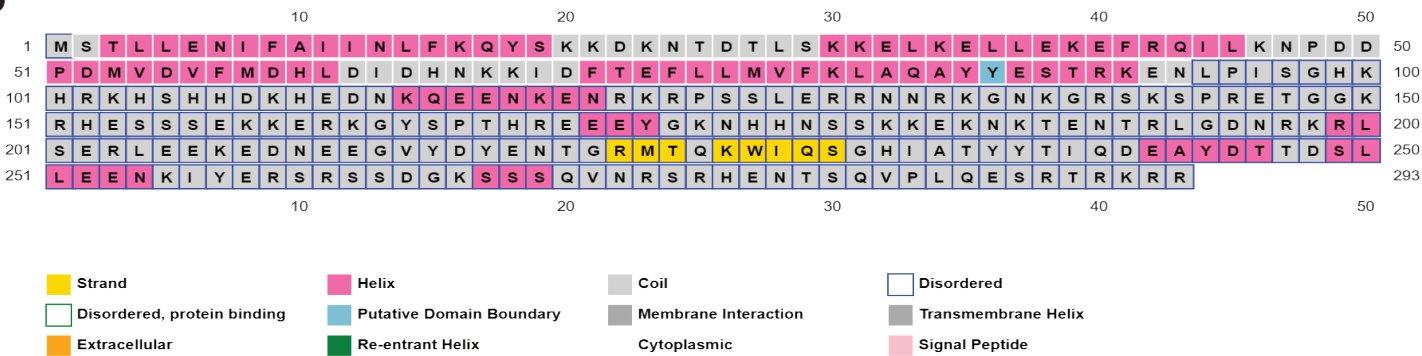

**Supplementary Figure S5.** The B domain is predicted to be highly disordered with little rigid secondary structure.

a. Disorder prediction (DISOPRED, University College London) for the human profilaggrin N-terminus (PF-AB). All data points above the red threshold line represent elevated disorder prediction. The profilaggrin S100 (A) domain (residues ~1-88) is predicted to be highly ordered compared to the B domain (~89-293) with the exception of one region (residues ~220-250) that is C-terminal to the nuclear localization signal (NLS).

b. Secondary structure (SS) prediction of the human profilaggrin N-terminus (PF-AB) (PSIPRED, University College London) demonstrates over 70% disorder prediction for the B domain. The predominant SS type is (random) coil with a few small alpha-helices and beta-sheets scattered throughout the sequence.
